# Supplementary material
Source: HighWire-hosted journal article supplement (https://bmjopen.bmj.com/content/11/9/e046017)
Supplement: inline-supplementary-material-1 [file inline-supplementary-material-1.pdf]

### Supplementary materials

**eList 1.** Search strategy (PsycINFO and MEDLINE)

**eFig. 1.** Funnel plot – Efficacy of PPT in increasing positive outcomes in comparison to waitlist control conditions at post-treatment

**eFig. 2.** Forest plot – Efficacy of PPT in increasing positive outcomes in comparison to waitlist control conditions at follow-up

**eFig. 3.** Forest plot – Efficacy of PPT in increasing satisfaction with life in comparison to waitlist control conditions at post-treatment

**eFig. 4.** Forest plot – Efficacy of PPT in increasing positive outcomes in comparison to active control conditions at post-treatment

**eFig. 5.** Forest plot – Efficacy of PPT in increasing positive outcomes in comparison to other active treatment conditions at post-treatment

**eFig. 6.** Forest plot – Efficacy of PPT in decreasing depression in comparison to waitlist control conditions at post-treatment

**eFig. 7.** Forest plot – Efficacy of PPT in decreasing negative outcomes in comparison to active control conditions at post-treatment

**eFig. 8.** Forest plot – Efficacy of PPT in decreasing negative outcomes in comparison to other active treatment conditions at post-treatment

**eTable 1.** Leave1 out sensitivity analyses for main-analyses (PPT vs. WLC at post assessment)

**eList 1.** Search strategy (PsycINFO and MEDLINE)

**Search terms and strategy:** "TI positive psychotherapy OR AB positive psychotherapy OR SU positive psychotherapy".

**Time limit:** Jan 1 2006 to Feb 13 2020.

**Other limits and filters:** None.

**eFig. 1.** Funnel plot – Efficacy of PPT in increasing positive outcomes in comparison to waitlist control conditions at post-treatment

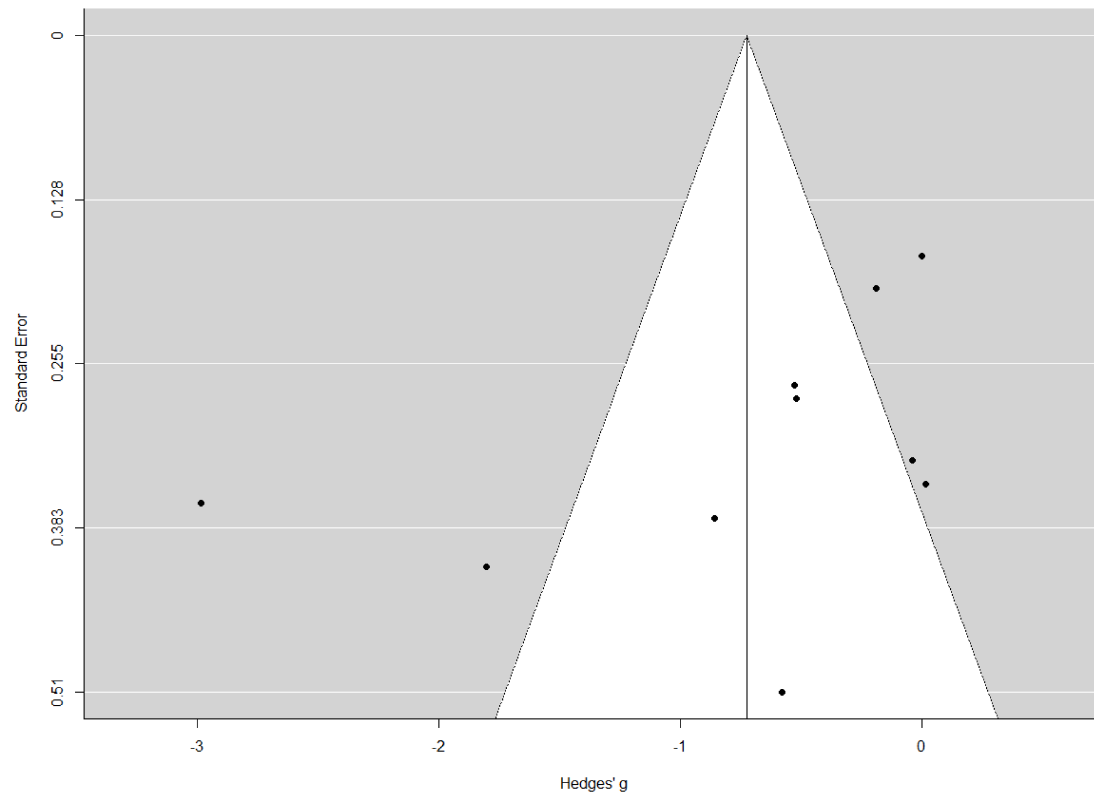

**eFig. 2.** Forest plot – Efficacy of PPT in increasing positive outcomes in comparison to waitlist control conditions at follow-up

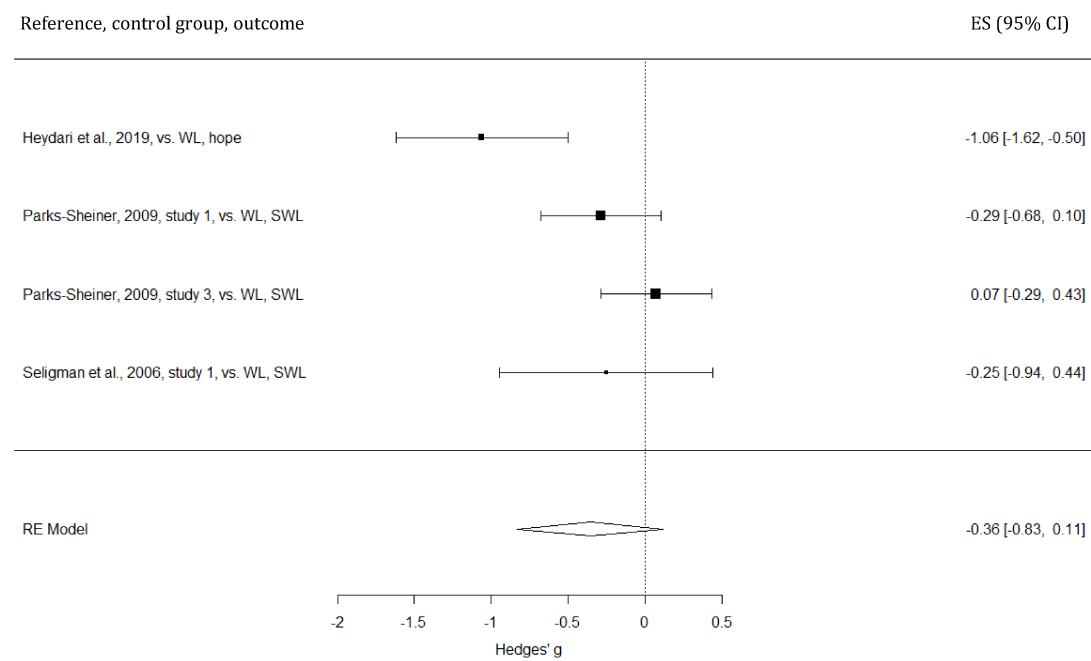

CI, confidence interval; ES, effect size (Hedges'  $g$ ); RE Model, Random Effects Model; SWL, Satisfaction With Life; WL, Waitlist control. Size of squares indicates size of trial (i.e.,  $N$ ) proportionally. Width of diamond indicates the 95% confidence interval of pooled effect size.

**eFig. 3.** Forest plot – Efficacy of PPT in increasing satisfaction with life (SWL) in comparison to waitlist control conditions at post-treatment

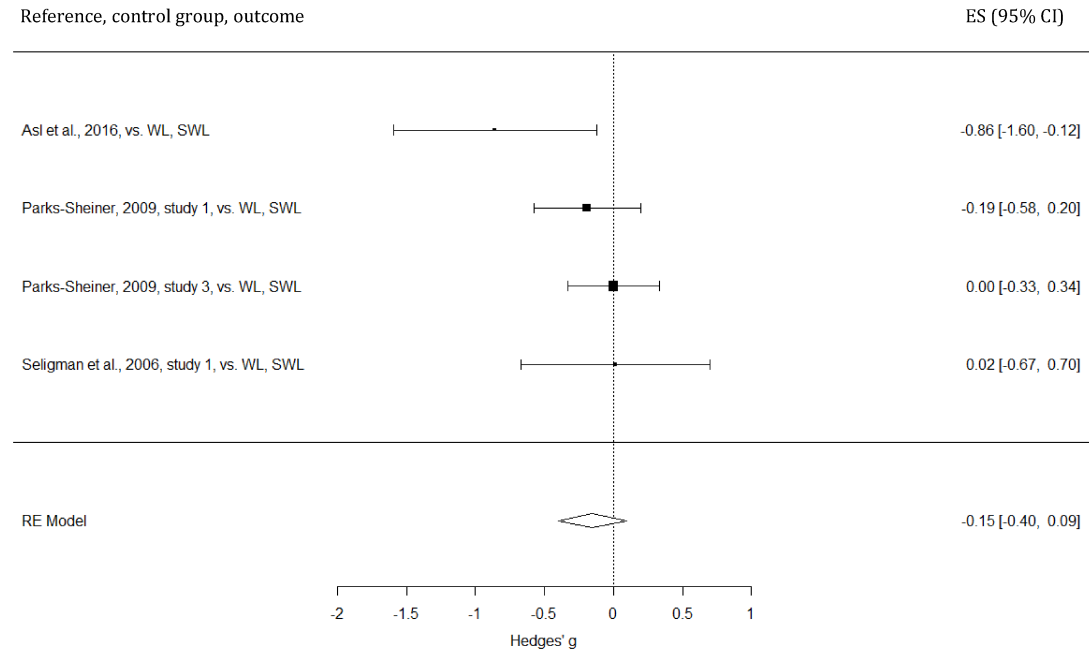

CI, confidence interval; ES, effect size (Hedges' g); RE Model, Random Effects Model; WL, Waitlist control. Size of squares indicates size of trial (i.e.,  $N$ ) proportionally. Width of diamond indicates the 95% confidence interval of pooled effect size.

**eFig. 4.** Forest plot – Efficacy of PPT in increasing positive outcomes in comparison to active control conditions at post-treatment

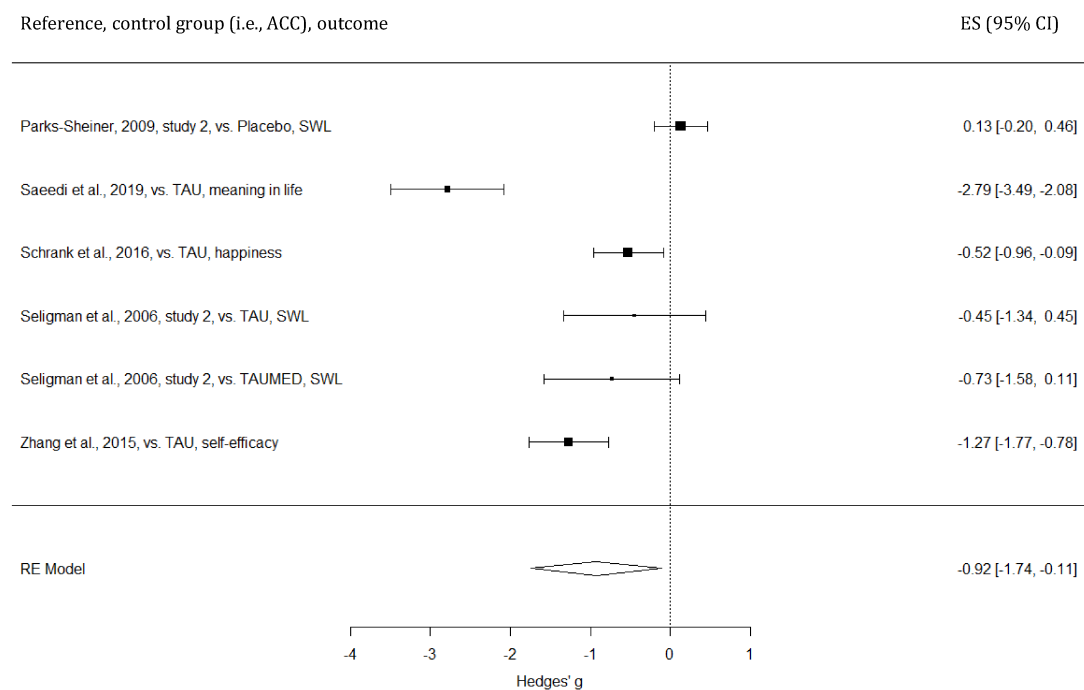

ACC, Active Control Condition; CI, confidence interval; ES, effect size (Hedges' g); Placebo, pill Placebo; RE Model, Random Effects Model; SWL, Satisfaction With Life; TAU, Treatment-As-Usual; TAUMED, Treatment-As-Usual plus antidepressant Medication. Size of squares indicates size of trial (i.e.,  $N$ ) proportionally. Width of diamond indicates the 95% confidence interval of pooled effect size.

**eFig. 5.** Forest plot – Efficacy of PPT in increasing positive outcomes in comparison to other active treatment conditions (OtherATC) at post-treatment

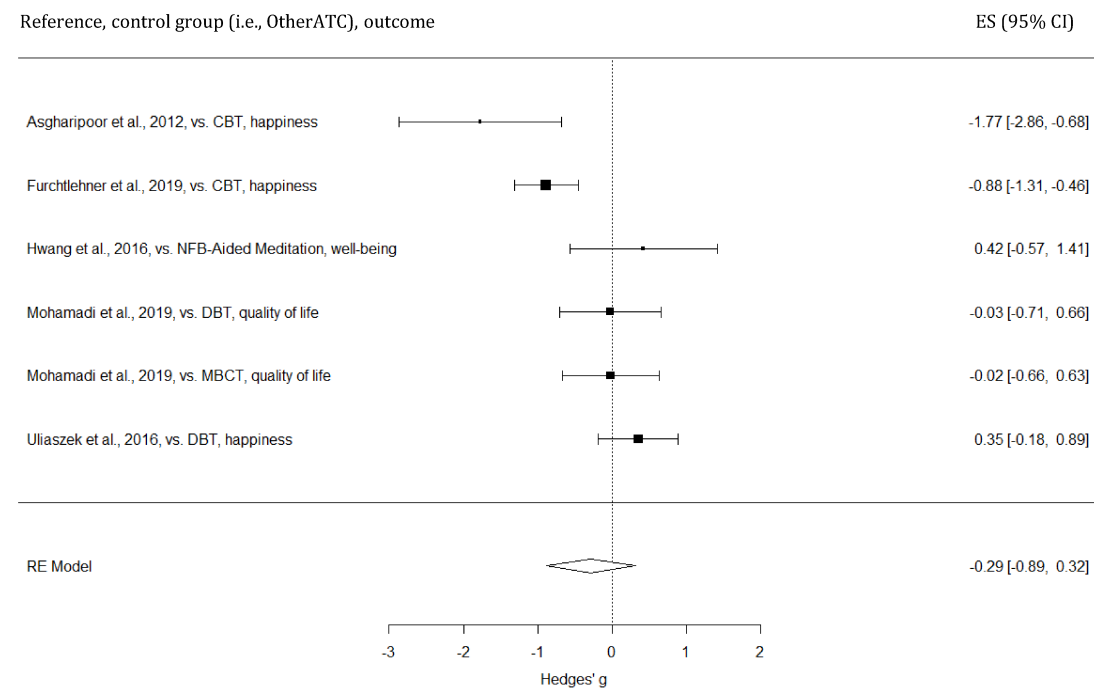

CBT, Cognitive Behavior Therapy; CI, confidence interval; DBT, Dialectic Behavior Therapy; ES, effect size (Hedges' g); MBCT, Mindfulness-Based Cognitive Therapy; NFB-Aided Meditation, Neurofeedback-Aided Meditation; OtherATC, Other Active Treatment Condition; RE Model, Random Effects Model. Size of squares indicates size of trial (i.e.,  $N$ ) proportionally. Width of diamond indicates the 95% confidence interval of pooled effect size.

**eFig. 6.** Forest plot – Efficacy of PPT in decreasing depression in comparison to waitlist control conditions at post-treatment

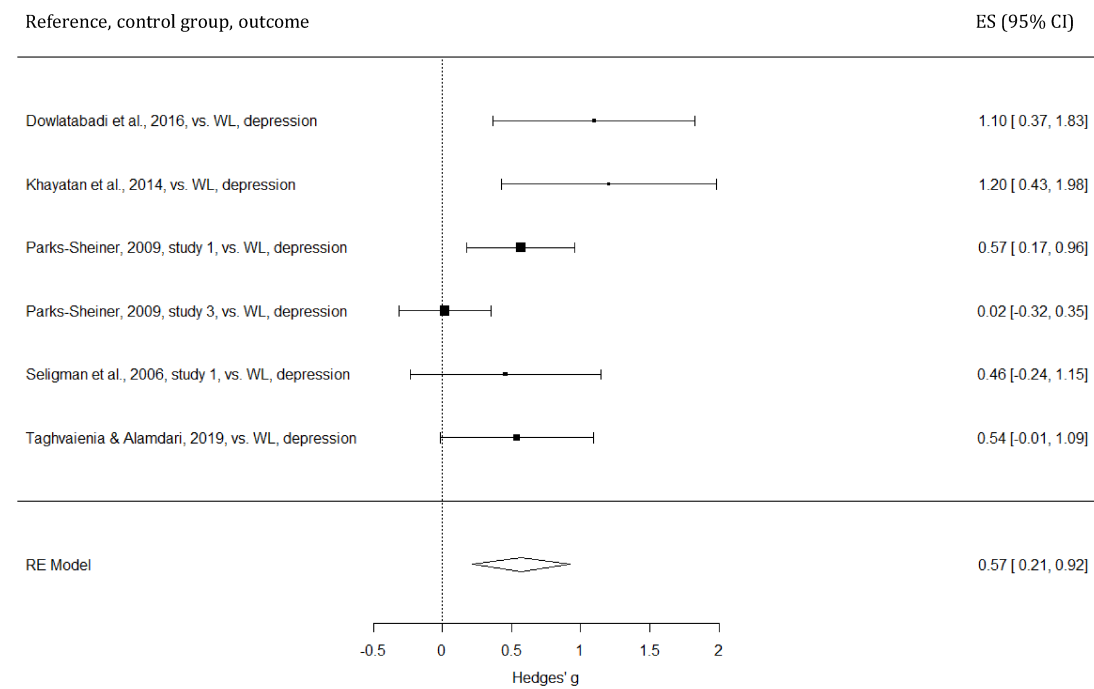

CI, confidence interval; ES, effect size (Hedges' g); RE Model, Random Effects Model; WL, Waitlist control. Size of squares indicates size of trial (i.e.,  $N$ ) proportionally. Width of diamond indicates the 95% confidence interval of pooled effect size.



**eFig. 7.** Forest plot – Efficacy of PPT in decreasing negative outcomes in comparison to active control conditions at post-treatment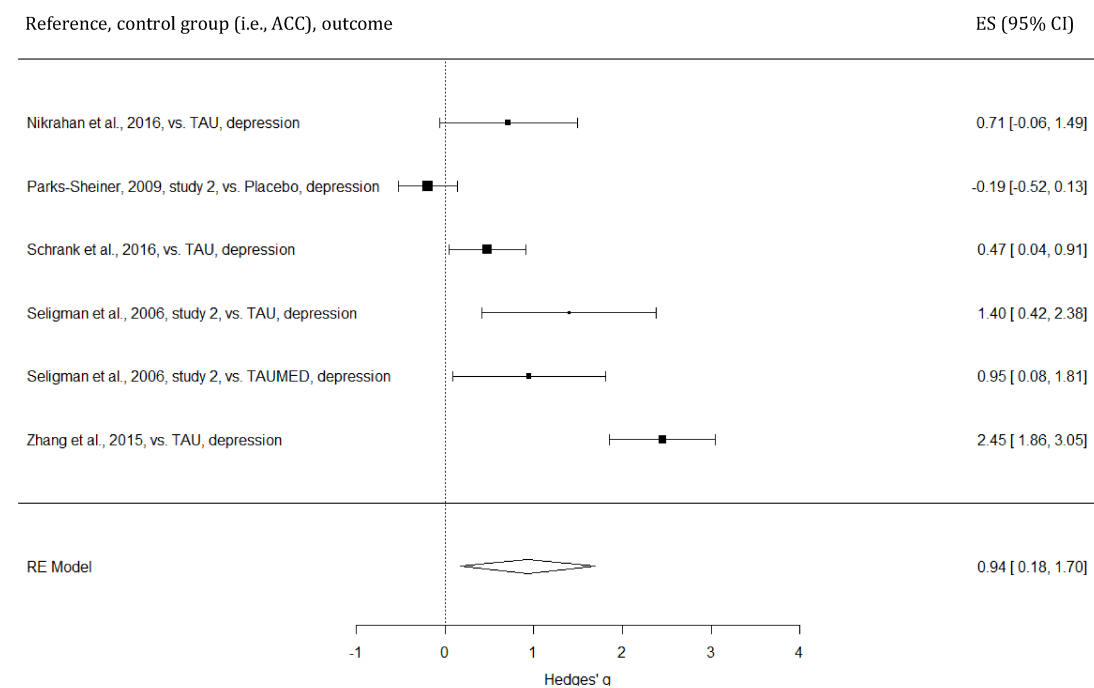

ACC, Active Control Condition; CI, confidence interval; ES, effect size (Hedges' g); RE Model, Random Effects Model; TAU, Treatment-As-Usual; TAUMED, Treatment-As-Usual plus antidepressant Medication. Size of squares indicates size of trial (i.e.,  $N$ ) proportionally. Width of diamond indicates the 95% confidence interval of pooled effect size.

**eFig. 8.** Forest plot – Efficacy of PPT in decreasing negative outcomes in comparison to other active treatment conditions (OtherATC) at post-treatment

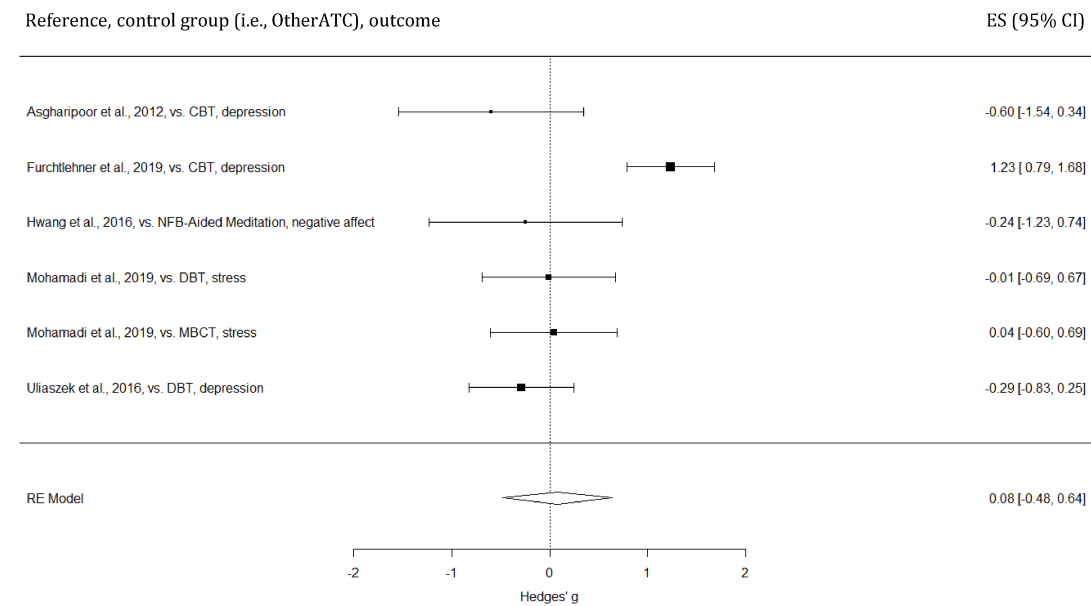

CBT, Cognitive Behavior Therapy; CI, confidence interval; DBT, Dialectic Behavior Therapy; ES, effect size (Hedges' g); MBCT, Mindfulness-Based Cognitive Therapy; NFB-Aided Meditation, Neurofeedback-Aided Meditation; OtherATC, Other Active Treatment Condition; RE Model, Random Effects Model. Size of squares indicates size of trial (i.e.,  $N$ ) proportionally. Width of diamond indicates the 95% confidence interval of pooled effect size.

| <b>eTable 1.</b> Leaveout sensitivity analyses for main-analyses (PPT vs. WL at post assessment) |                    |           |          |          |
|--------------------------------------------------------------------------------------------------|--------------------|-----------|----------|----------|
| <b>Trial omitted (negative outcome assessed)</b>                                                 | <b>Corrected g</b> | <b>SE</b> | <b>Z</b> | <b>Q</b> |
| Dowlatabadi et al., 2016 (depression)                                                            | 0.40               | 0.15      | 2.76**   | 10.90    |
| Hwang et al., 2016 (negative affect)                                                             | 0.50               | 0.16      | 3.03**   | 14.63*   |
| Khayatan et al., 2014 (depression)                                                               | 0.40               | 0.14      | 2.79**   | 10.28    |
| Mohamadi et al., 2019 (stress)                                                                   | 0.54               | 0.16      | 3.28**   | 13.46*   |
| Parks-Sheiner, 2009, study 1 (depression)                                                        | 0.47               | 0.18      | 2.61**   | 13.74*   |
| Parks-Sheiner, 2009, study 3 (depression)                                                        | 0.58               | 0.12      | 4.93***  | 7.30     |
| Seligman et al., 2006, study 1 (depression)                                                      | 0.49               | 0.17      | 2.86**   | 14.62*   |
| Taghvaenia & Alamdari, 2019 (depression)                                                         | 0.48               | 0.18      | 2.73**   | 14.37*   |
| <b>Trial omitted (sub-analysis on depression only)</b>                                           |                    |           |          |          |
| Dowlatabadi et al., 2016                                                                         | 0.48               | 0.18      | 2.64**   | 10.02*   |
| Khayatan et al., 2014                                                                            | 0.47               | 0.17      | 2.68**   | 9.41     |
| Parks-Sheiner, 2009, study 1                                                                     | 0.59               | 0.23      | 2.55*    | 12.84*   |
| Parks-Sheiner, 2009, study 3                                                                     | 0.68               | 0.13      | 5.21***  | 3.96     |
| Seligman et al., 2006, study 1                                                                   | 0.60               | 0.21      | 2.79**   | 13.41**  |
| Taghvaenia & Alamdari, 2019                                                                      | 0.59               | 0.22      | 2.66**   | 13.27*   |
| <b>Trial omitted (positive outcome assessed)</b>                                                 |                    |           |          |          |
| Abdeyan et al., 2018 (hope)                                                                      | -0.44              | 0.17      | -2.55*   | 21.89**  |
| Asl et al., 2016 (SWL)                                                                           | -0.71              | 0.33      | -2.14*   | 71.62*** |
| Dowlatabadi et al., 2016 (happiness)                                                             | -0.61              | 0.31      | 2.00*    | 61.85*** |
| Heydari et al., 2019 (hope)                                                                      | -0.75              | 0.33      | -2.24*   | 72.70*** |
| Hwang et al., 2016 (well-being)                                                                  | -0.74              | 0.33      | -2.25*   | 72.70*** |
| Mohamadi et al., 2019 (quality of life)                                                          | 0.80               | 0.32      | -2.48*   | 70.88*** |
| Parks-Sheiner, 2009, study 1 (SWL)                                                               | -0.79              | 0.33      | -2.40*   | 70.19*** |
| Parks-Sheiner, 2009, study 3 (SWL)                                                               | -0.82              | 0.32      | -2.53*   | 62.36*** |
| Seligman et al., 2006, study 1 (SWL)                                                             | -0.81              | 0.32      | -2.51*   | 70.66*** |
| Taghvaenia & Alamdari, 2019 (happiness)                                                          | -0.75              | 0.33      | -2.25*   | 72.71*** |
| <b>Trial omitted (sub-analysis on SLW only)</b>                                                  |                    |           |          |          |
| Asl et al., 2016                                                                                 | -0.07              | 0.12      | -0.57    | 0.60     |
| Parks-Sheiner, 2009, study 1                                                                     | -0.22              | 0.26      | -0.85    | 4.53     |
| Parks-Sheiner, 2009, study 3                                                                     | -0.29              | 0.20      | -1.42    | 3.30     |
| Seligman et al., 2006, study 1                                                                   | -0.24              | 0.20      | -1.20    | 4.37     |

Corrected g, pooled Hedges' g effect size when given trial was omitted from the random effects analysis; SE, standard error; SWL, Satisfaction With Life; WL = Waitlist control conditions; Z, standardized z-score for pooled effect size including statistical significance level as indicated below.

\* p < .05; \*\* p < 0.01; \*\*\* p < .001
